# Supplementary material for: Analyzing the associations between tertiary lymphoid structures and postoperative prognosis, along with immunotherapy response in gastric cancer: findings from pooled cohort studies
Source: Springer Nature journal article supplement (doi:10.1007/s00432-024-05672-y), 2024-03-22
Supplement: MOESM5 [file 26895374]

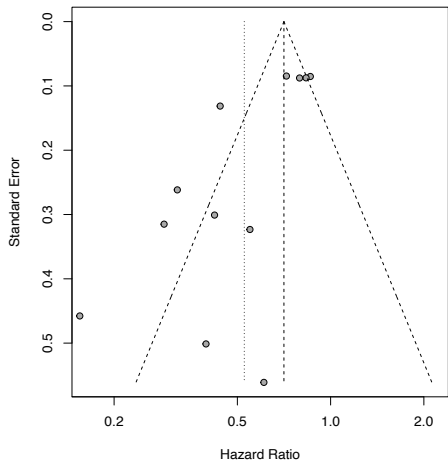

(A)

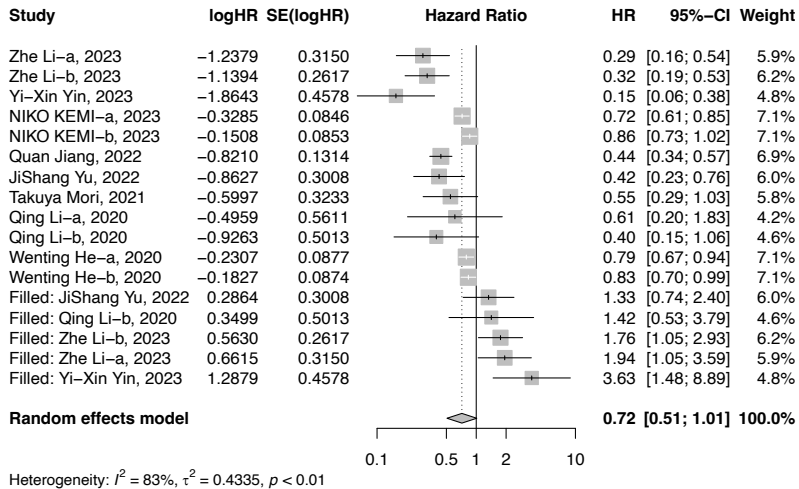

(B)

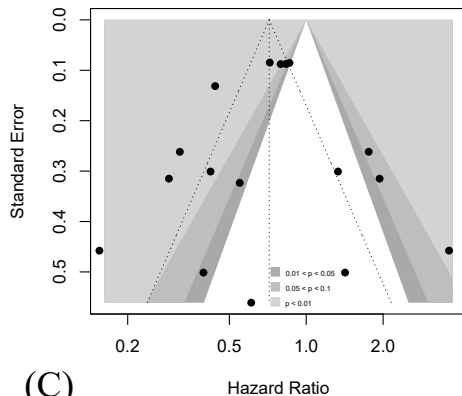

(C)

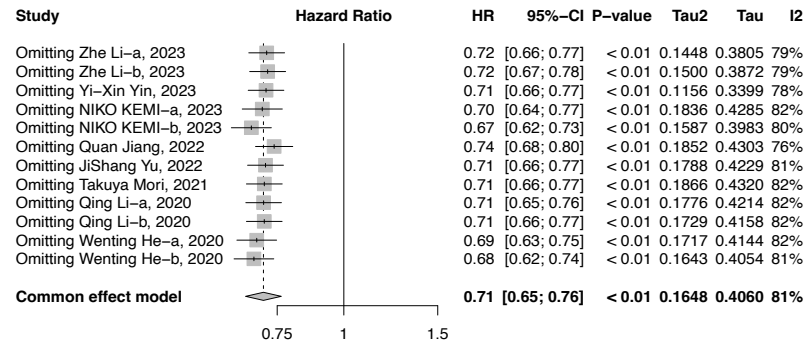

(D)
