# Supplementary material for: Analyzing the associations between tertiary lymphoid structures and postoperative prognosis, along with immunotherapy response in gastric cancer: findings from pooled cohort studies
Source: Springer Nature journal article supplement (doi:10.1007/s00432-024-05672-y), 2024-03-22
Supplement: MOESM6 [file 26895374]

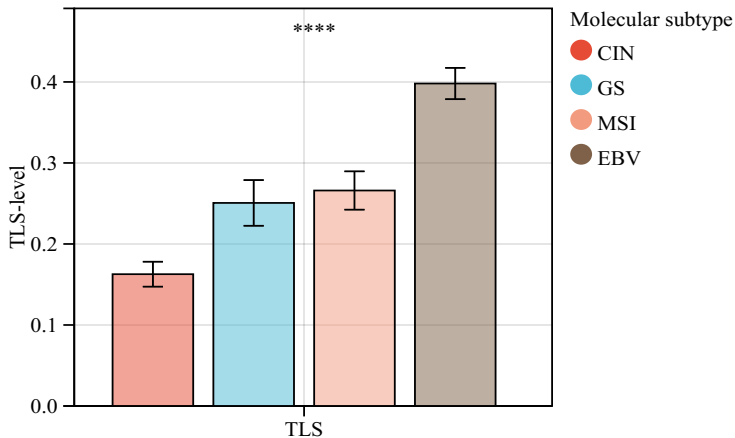

(A)

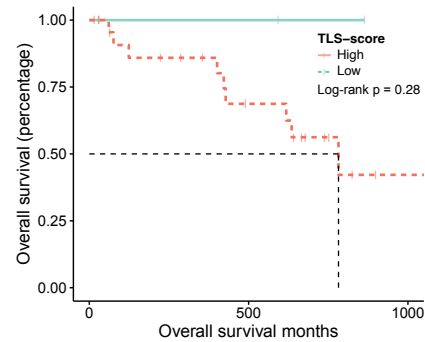

(B)

**Number at risk**

|      |    |    |   |
|------|----|----|---|
| Low  | 2  | 2  | 0 |
| High | 25 | 11 | 1 |

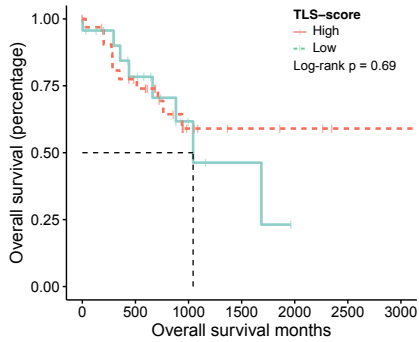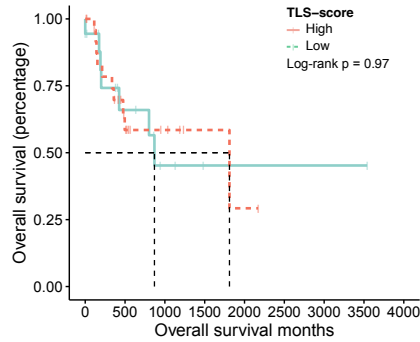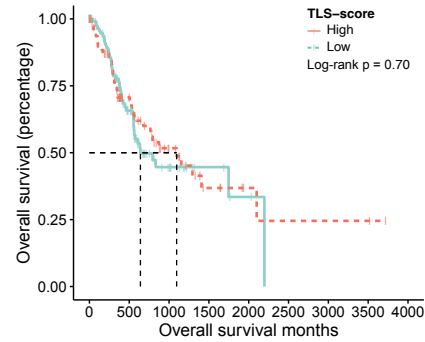

(C)

(D)

(E)

**Number at risk**

|      |    |    |   |   |   |   |   |
|------|----|----|---|---|---|---|---|
| Low  | 24 | 13 | 4 | 2 | 0 | 0 | 0 |
| High | 36 | 22 | 7 | 4 | 3 | 1 | 1 |

**Number at risk**

|      |    |    |   |   |   |   |   |   |
|------|----|----|---|---|---|---|---|---|
| Low  | 18 | 8  | 3 | 1 | 1 | 1 | 1 | 0 |
| High | 26 | 10 | 5 | 2 | 1 | 0 | 0 | 0 |

**Number at risk**

|      |     |    |    |   |   |   |   |   |   |
|------|-----|----|----|---|---|---|---|---|---|
| Low  | 123 | 47 | 15 | 5 | 2 | 0 | 0 | 0 | 0 |
| High | 82  | 42 | 19 | 7 | 3 | 2 | 2 | 2 | 0 |
